# Supplementary material for: Gendered Water Stewardship in Jordan and the influence of Women’s Knowledge, Attitudes, and Practices on Sustainability
Source: Research Square preprint supplement (doi:10.21203/rs.3.rs-8238314/v1), 2025-12-19
Supplement: Supplementary file 1 [file 3dd3e691dfae675ae563d3b9.docx]

# Appendix

## **Appendix (I): Semi-Structured Interview Guide**

| **Over-arching Research Question** | **What influence does the (knowledge, attitude, and practice) KAPs model have on water sustainability in Jordan?** | | | | |
| --- | --- | --- | --- | --- | --- |
| Sub-research question | 1. How women’s knowledge — grounded in sociocultural, spiritual, economic, political, and environmental realities — informs their attitudes toward water sustainability. 2. How these attitudes translate into water-related practices, particularly in reducing, reusing, and recycling water at the household and community levels. 3. How the notion of water stewardship is understood and enacted by women as they navigate water scarcity. | | | | |
| **Participants /Themes** | Knowledge | Attitude | Practice | Water Stewardship and Community | SDG6 Cleaner water and Sanitation |
| Women | Obviously, you manage natural water resources at the household …….  1.How did you first learn about water scarcity or water conservation?  2.What do you know about where your household water comes from?  3.Are there local or religious teachings that influence how you think about water use?  4. How do economic or political conditions affect your ability to manage water at home? | 5. How important is saving water for you and your family? Why?  6.What does “responsible water use” mean to you?  7.How do you feel when water is wasted or misused by others? | 8.What actions do you take to reduce or reuse water in daily life?  9.Have you adopted any tools or techniques to save water (for example, buckets, timers, greywater reuse)?  10.How do members of your family—especially men, children, or elders—participate in these practices? | 11.How do you understand the idea of “water stewardship”?  12. Are there community initiatives, women’s groups, or NGOs that support water saving or awareness in your area?  13.What role do you think women can play in shaping decisions about water in Jordan? | 14.In your opinion, what would help families manage water ‘more’ sustainably?  15.If you could change one thing about how water is managed in Jordan, what would it be and why? |
| Private Water Companies | Obviously, your organisation manages natural water resources to sustain socio-economic and environmental development…….  1-Can you tell me about the significance of water? In Jordan.  2-If any, what issues and/or challenges do - we face regarding water?  Water Sustainability is an important issue in Jordan. Therefore, could you tell me……  3-Who is impacted by the water issue and challenges?  4- How do these water issues and challenges impact them?  5-In your opinion, what causes the water issue?    6- Why are we facing these water- issues and challenges? | 7-How does this influence your attitude/approach towards water-related issues? in Jordan | 8-How does this influence your operation and practice/behaviour towards water-related issues? in Jordan | Hence, water sustainability is a topical subject ….  9-What is your opinion on water sustainability? Which is meeting the needs of the present without compromising the ability of future generations to meet their cleaner water and sanitation needs.  10- What is your opinion on women playing a central part in water provision, management, and safeguarding? | Obviously, the UN -sustainable development Agenda for 2030 ... is a topic of current interest …  11-What is the organisation’s understanding of the UN -sustainable development Agenda for 2030?  12- How can the organisation contribute to attaining agenda 2030- SDG 6, specifically SDG 6.2?  13-Thank you. Is there anything else you would like to discuss? |
| Government | Obviously, your ministry is responsible for …….  1 Can you tell me about the significance of water? in Jordan.  2-If any, what issues and/or challenges do - we face regarding water?  Water Sustainability is an important issue in Jordan. Therefore, could you tell me……  3-Who is impacted by the water issue and challenges?  4- How are they impacted by these water issues and challenges?  5-In your opinion, what causes the water issue?    6- Why are we facing these water- issues and challenges? | 7-How does this influence your institutions attitude/approach towards water-related issues? in Jordan | 8-How does this influence your institutions operation and practice/behaviour towards water-related issues? in Jordan | Hence, water sustainability is a topical subject ….  9-What is your opinion on water sustainability? which is meeting the needs of the present without compromising the ability of future generations to meet their own cleaner water and sanitation needs.  10- What is your opinion on women playing a central part in the provision, management and safeguarding of water? | Obviously, UN -sustainable development Agenda for 2030 ... is a topic of current interest …  11-What is the organisation’s understanding of the UN -sustainable development Agenda for 2030?  12- How can the organisation contribute towards the attainment of agenda 2030- SDG 6, specifically SDG 6.2?  13-Thank you, is there anything else you would like to discuss? |
| Parliament -Members, Representatives, Committees | Obviously, you influence policy around the provision of water resources….  1-Can you tell me about the significance of water? in Jordan.  2-If any, what issues and/or challenges do - we face regarding water?  Water Sustainability is an important issue in Jordan. Therefore, could you tell me……  3-Who is impacted by the water issue and challenges?  4- How are they impacted by these water issues and challenges?  5-In your opinion, what causes the water issue?    6- Why are we facing these water- issues and challenges? | 7-How does this influence your institutions attitude/approach towards water-related issues? in Jordan | 8-How does this influence your institutions operation and practice/behaviour towards water-related issues? in Jordan | Hence, water sustainability is a topical subject ….  9-What is your opinion on water sustainability? which is meeting the needs of the present without compromising the ability of future generations to meet their own cleaner water and sanitation needs.  10- What is your opinion on women playing a central part in the provision, management and safeguarding of water? | Obviously, UN -sustainable development Agenda for 2030 ... is a topic of current interest …  11-What is the organisation’s understanding of the UN -sustainable development Agenda for 2030?  12- How can the organisation contribute towards the attainment of agenda 2030- SDG 6, specifically SDG 6.2?  13-Thank you, is there anything else you would like to discuss? |
| International Organisations, & Non-Governmental Organization (NGOs) | Obviously, your institution is responsible for …….  1-Can you tell me about the significance of water? in Jordan.  2-If any, what issues and/or challenges do - we face regarding water?  Water Sustainability is an important issue in Jordan. Therefore, could you tell me……  3-Who is impacted by the water issue and challenges?  4- How are they impacted by these water issues and challenges?  5-In your opinion, what causes the water issue?    6- Why are we facing these water- issues and challenges? | 7-How does this influence your institutions attitude/approach towards water-related issues? in Jordan | 8-How does this influence your institutions operation and practice/behaviour towards water-related issues? in Jordan | Hence, water sustainability is a topical subject ….  9-What is your opinion on water sustainability? which is meeting the needs of the present without compromising the ability of future generations to meet their own cleaner water and sanitation needs.  10- What is your opinion on women playing a central part in the provision, management and safeguarding of water? | Obviously, UN -sustainable development Agenda for 2030 ... is a topic of current interest …  11-What is the organisation’s understanding of the UN -sustainable development Agenda for 2030?  12- How can the organisation contribute towards the attainment of agenda 2030- SDG 6, specifically SDG 6.2?  13-Thank you, is there anything else you would like to discuss? |
| Higher Education Institutions | Obviously, your institution publishes research on …….  1- Can you tell me about the significance of water? in Jordan.  2-If any, what issues and/or challenges do - we face regarding water?  Water Sustainability is an important issue in Jordan. Therefore, could you tell me……  3-Who is impacted by the water issue and challenges?  4- How are they impacted by these water issues and challenges?  5-In your opinion, what causes the water issue?    6- Why are we facing these water- issues and challenges? | 7-How does this influence your institution’s attitude/approach towards water-related issues? in Jordan | 8-How does this influence your institution’s operation and practice/behaviour towards water-related issues? in Jordan | Hence, water sustainability is a topical subject ….  9-What is your opinion on water sustainability? which is meeting the needs of the present without compromising the ability of future generations to meet their own cleaner water and sanitation needs.  10- What is your opinion on women playing a central part in the provision, management and safeguarding of water? | Obviously, UN -sustainable development Agenda for 2030 ... is a topic of current interest …  11-What is the organisation’s understanding of the UN -sustainable development Agenda for 2030?  12- How can the organisation contribute towards the attainment of agenda 2030- SDG 6, specifically SDG 6.2?  13-Thank you, is there anything else you would like to discuss? |

## **Appendix (II): Participant Profile Summary**

| **Table A. Women Participants (n = 15)** | | | | | | | |
| --- | --- | --- | --- | --- | --- | --- | --- |
| **Participant Code** | **Age** | **Location** | **Occupation** | **Education** | **Marital Status** | **Region** | **Primary Water Role / Experience** |
| W01 | 29 | Amman | Teacher | Bachelor’s | Married | Urban | Household management; promotes water reuse at home |
| W02 | 41 | Zarqa | Homemaker | Secondary | Married | Urban | Daily water storage and distribution for family |
| W03 | 52 | Karak | Farmer | Primary | Married | Rural | Irrigation and domestic water reuse for crops |
| W04 | 33 | Irbid | NGO Volunteer | Bachelor’s | Single | Urban | Community awareness campaigns on water saving |
| W05 | 46 | Tafileh | Housewife | Primary | Married | Rural | Responsible for rationing and greywater recycling |
| W06 | 37 | Mafraq | Teacher | Diploma | Married | Rural | Monitors household consumption; teaches children conservation |
| W07 | 24 | Amman | University Student | Bachelor’s | Single | Urban | Adopts modern conservation devices; social media awareness |
| W08 | 55 | Karak | Retired Nurse | Secondary | Widow | Rural | Household-level reuse and water storage strategies |
| W09 | 48 | Irbid | Shop Owner | Bachelor’s | Married | Urban | Implements business-level water-saving measures |
| W10 | 31 | Zarqa | NGO Field Assistant | Bachelor’s | Married | Urban | Advocates for SDG 6 community projects |
| W11 | 44 | Mafraq | Farmer | Primary | Married | Rural | Applies traditional reuse methods for irrigation |
| W12 | 26 | Amman | Engineer | Bachelor’s | Single | Urban | Promotes technological awareness of water meters |
| W13 | 39 | Karak | School Administrator | Bachelor’s | Married | Rural | Supervises hygiene and conservation campaigns |
| W14 | 50 | Irbid | Homemaker | Secondary | Married | Urban | Experienced water shortages; shares coping practices |
| W15 | 35 | Tafileh | NGO Coordinator | Master’s | Married | Rural | Engages women’s groups on water stewardship |

| **Table B. Institutional Stakeholders (n = 10)** | | | | | | | |
| --- | --- | --- | --- | --- | --- | --- | --- |
| **Participant Code** | **Institution / Organization** | **Position** | **Sector** | **Gender** | **Area of Expertise** | **Years of Experience** | **Focus in Interview** |
| I01 | Ministry of Water and Irrigation | Engineer | Government | M | Demand Management | 12 | Water supply governance and rationing policy |
| I02 | Water Authority of Jordan | Director of Planning | Government | M | Water Policy & Infrastructure | 18 | National policy framework; infrastructure gaps |
| I03 | Parliamentary Water Committee | Member | Public Sector | F | Legislation & Oversight | 9 | Gender inclusion in national water legislation |
| I04 | Jordan Valley Authority | Hydrologist | Government | M | Resource Allocation | 15 | Irrigation and equity in water distribution |
| I05 | Non-Governmental Organization | Programme Officer | Nonprofit | F | Gender and Water Advocacy | 8 | Women’s participation in water governance |
| I06 | International Organization | Environmental Scientist | Research | M | Sustainability & Innovation | 11 | Water-saving technologies and public education |
| I07 | International Organization | Programme Advisor | International Org | F | SDG 6 Implementation | 10 | Gender mainstreaming in water projects |
| I08 | Private Water Utility (Amman) | Operations Manager | Private | M | Water Efficiency | 7 | Urban water supply and tariff management |
| I09 | University | Lecturer | Academia | F | Environmental Policy | 6 | Integrating stewardship into higher education |
| I10 | Non-Governmental Organization | Regional Coordinator | Nonprofit | F | Community Outreach | 13 | Linking local stewardship to SDG frameworks |

## **Appendix (III). Thematic Map and Codebook**

| **Table 1. Thematic Map** | | | |
| --- | --- | --- | --- |
| **Theme** | **Sub-Themes** | **Illustrative Quote (Anonymised)** | **Linked KAP Dimension / Stewardship Lens** |
| Experiential **Knowledge** of Scarcity | • Sociocultural knowledge • Religious & spiritual knowledge • Environmental awareness • Economic constraints • Political understanding | “Every week we wait for the water truck. I save every drop because God says waste is haram.” (W06) | Knowledge — lived, moral, spiritual, political |
| Normative **Attitudes** toward Water | • Ethical duty and care • Fairness and equity • Inter-generational obligation | “Water is a trust; if we waste it, we take from our children.” (W08) | Attitude — moral–religious orientation; stewardship ethics |
| Adaptive **Practices** and Coping Strategies | • Household reuse and recycling • Collective storage • Behavioural adjustment • Community sharing • Use of technological aids | “I reuse the laundry water for the plants; everyone in our street does now.” (W03) | Practice — everyday behaviour; adaptive resilience |
| **Water Stewardship** and Community | • Exclusion from decision-making • Tokenistic consultation • Structural bias • Policy disconnects • Resource inequality | “We speak in meetings, but the decisions are already written.” (I05) | Cross-cutting — links K–A–P through power and governance |
| **SDG6** Cleaner water and Sanitation | • Collective action • Capacity building • Women’s leadership • Education and advocacy • Partnership for SDG 6 | “When women lead awareness campaigns, families listen.” (I07) | Stewardship dimension — ethical labour and agency |

| **Table 2. Codebook Summary** | | | | |
| --- | --- | --- | --- | --- |
| **Code Category** | **Definition / Analytical Focus** | **Example Data Extract (Anonymised)** | **Linked Theme** | **KAP Dimension / Stewardship Lens** |
| Cultural Meaning of Water | How cultural norms and family teachings shape perceptions of scarcity and obligation. | “My mother taught me that water is a blessing from God; we never leave the tap running.” (W04) | Experiential Knowledge of Scarcity | Knowledge — sociocultural and moral |
| Religious Stewardship | Faith-based interpretations of conservation as a spiritual duty. | “The imam reminds us every Friday not to waste water, even in prayer.” (W10) | Experiential Knowledge of Scarcity | Knowledge — religious and ethical |
| Environmental Awareness | Understanding of climate, topography, and local hydrology as contributors to scarcity. | “The wells have dried because the rains stopped years ago.” (W11) | Experiential Knowledge of Scarcity | Knowledge — environmental literacy |
| Economic Constraints | Household income and affordability influencing access, storage, and reuse. | “The tank water costs more each month; we can’t afford it.” (W07) | Experiential Knowledge of Scarcity | Knowledge — economic / structural |
| Political Understanding | Awareness of government mismanagement, transboundary water politics, or inequitable distribution. | “They build big projects, but our neighbourhood still gets water only twice a week.” (W12) | Experiential Knowledge of Scarcity | Knowledge — political and governance awareness |
| Ethical Duty and Care | Belief that saving water is a moral and social responsibility. | “If I waste water, my neighbours suffer too.” (W01) | Normative Attitudes toward Water | Attitude — moral obligation / care ethics |
| Fairness and Equity | Perceptions of injustice in allocation between regions or social classes. | “In rich areas water flows daily; here we wait.” (W05) | Normative Attitudes toward Water | Attitude — fairness / justice orientation |
| Inter-Generational Obligation | Concern for future generations and moral continuity. | “We teach our children to value water so they won’t repeat our mistakes.” (W08) | Normative Attitudes toward Water | Attitude — intergenerational stewardship |
| Household Reuse and Recycling | Domestic practices of greywater reuse, recycling, or conservation routines. | “I collect shower water to wash the floors; nothing goes to waste.” (W03) | Adaptive Practices and Coping Strategies | Practice — behaviour / conservation |
| Collective Storage & Sharing | Informal neighbourhood systems of pooling or sharing limited supply. | “We fill tanks together when the water arrives; we take turns.” (W09) | Adaptive Practices and Coping Strategies | Practice — cooperative adaptation |
| Behavioural Adjustment | Changing daily routines to adapt to intermittent supply. | “We do laundry only on Fridays when the pressure is stronger.” (W13) | Adaptive Practices and Coping Strategies | Practice — habitual change / resilience |
| Technological Aids | Use of low-flow devices, filters, or smart meters to improve efficiency. | “The smart meter helps us monitor waste, but it’s expensive.” (I08) | Adaptive Practices and Coping Strategies | Practice — technical adaptation |
| Exclusion from Decision-Making | Experiences of marginalisation in local or national water governance. | “Men attend the municipal meetings; we only hear the results.” (W14) | Water Stewardship and Community | Cross-cutting — power / governance |
| Tokenistic Consultation | Superficial inclusion of women without actual influence on decisions. | “They invite women for photos, not for opinions.” (I05) | Water Stewardship and Community | Cross-cutting — participation and representation |
| Policy Disconnects | Disjuncture between national policy and lived realities. | “Policies talk about efficiency, but not about how water is supplied.” (I02) | Water Stewardship and Community | Cross-cutting — governance / institutional gap |
| Capacity Building & Collective Action | Community efforts or training that strengthen agency and leadership. | “Workshops helped us organise water-saving groups for women.” (I06) | SDG6 Cleaner Water and Sanitation | Stewardship — empowerment / education |
| Women’s Leadership | Examples of women leading local awareness or conservation initiatives. | “Our women’s group convinced families to install water saving devices.” (W15) | SDG6 Cleaner Water and Sanitation | Stewardship — gendered leadership |
| Partnership for SDG 6 | Collaboration among NGOs, government, and communities to meet UN targets. | “We align our projects with SDG 6 because of funding.” (I07) | SDG6 Cleaner Water and Sanitation | Stewardship — global–local linkage |
